# Supplementary material for: Reproducing an extreme flood with uncertain post-event information
Source: Copernicus journal article supplement (doi:10.5194/hess-21-3597-2017), 2017-07-17
Supplement: Supplementary file 1 [file hess-21-3597-2017-supplement.zip]

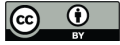

## *Supplement of*

# **Reproducing an extreme flood with uncertain post-event information**

**Diana Fuentes-Andino et al.**

*Correspondence to:* Diana Fuentes-Andino ([diana.fuentes@geo.uu.se](mailto:diana.fuentes@geo.uu.se))

- [hess-21-3597-2017-supplement-title-page.pdf](#)
- [Precipitation\\_Mitch.xlsx](#)
- [outflow\\_conception\\_dam\\_Mitch.xlsx](#)

The copyright of individual parts of the supplement might differ from the CC BY 3.0 License.
